# Supplementary material for: Dietary fucoidan extracted from macroalgaeSaccharina japonicaalleviate the hepatic lipid accumulation of black seabream (Acanthopagrus schlegelii)
Source: Royal Society of Chemistry journal article supplement (doi:10.1039/d1fo03490a), 2021-01-01
Supplement: d1fo03490a1.pdf [file d1fo03490a1.pdf]

### Supplementary Tables

Supplementary Table 1. Primers used for relative quantitative real-time PCR (qPCR) analysis.

| Primer         | Forward primer 5'-3'   | Reverse primer 5'-3'   |
|----------------|------------------------|------------------------|
| <i>β-actin</i> | ACAGTGCCCATCTATGAAGGCT | CTATCCAGGCAGTAGCTTTGAG |
| <i>akr1d1</i>  | TCGCTCACTGAGGAAGAAATG  | CATGGAATGGGTACTCTGGATG |
| <i>hrasls3</i> | CCGCGATCTGGTAACAATACT  | CACCAGAGTCAATCGGAATCA  |
| <i>elovl6</i>  | GCAACACACACAACAGACATAC | CTCCTGCGGTGGAAACATAA   |
| <i>scd</i>     | GGTCCACTAGAGCACACTAAAG | AAAGGAGGAGAAGAAGCGAAG  |
| <i>cers5</i>   | CAAGGAGACTGCCACAGAAA   | CACCGCAGGAACCAAGATAA   |
| <i>ugt2a2</i>  | CCAAGACTTTCCCTCCATCTAC | CCGACACTCTCGAATCTCTTTC |
| <i>ulk1</i>    | CTCCTCCAATTCAGCGTAAGAC | CCAGTATGACTCCAGGGTAGAT |

Supplementary Table 2. Effects of dietary fucoidan on proximate composition in muscle of black sea bream.

| Parameter | CTRL         | ASJ1         | ASJ2         |
|-----------|--------------|--------------|--------------|
| Moisture  | 75.74 ± 0.89 | 75.41 ± 1.68 | 75.74 ± 0.56 |
| Protein   | 21.41 ± 0.95 | 21.34 ± 1.08 | 21.54 ± 1.26 |
| Lipid     | 2.56 ± 0.15  | 2.50 ± 0.15  | 2.36 ± 0.18  |
| Ash       | 0.85 ± 0.03  | 0.89 ± 0.07  | 0.91 ± 0.06  |

Data are presented as means ± SD, n = 3 cages (20 fish/cage).

Supplementary Table 3. Sequencing reads after filtering.

| Sample | Clean Reads (Mb) | Clean Bases (Gb) | Q30 (%) | GC ratio (%) |
|--------|------------------|------------------|---------|--------------|
| CTRL   | 21.04            | 6.28             | 94.22   | 51.80        |
| ASJ1   | 24.37            | 7.26             | 94.31   | 51.67        |

Supplementary Table 4. Annotation result of each functional database.

| Values                     | Nr    | eggNOG | Swissprot | Pfam  | KOG   | KEGG  | GO    | COG   | Overall |
|----------------------------|-------|--------|-----------|-------|-------|-------|-------|-------|---------|
| Number, x10 <sup>3</sup> n | 27.24 | 26.84  | 14.86     | 19.42 | 17.85 | 16.71 | 15.96 | 6.65  | 29.38   |
| Percentage, %              | 92.72 | 91.37  | 50.58     | 66.11 | 60.74 | 56.89 | 54.33 | 22.65 | 100     |

Supplementary Table 5. Analysis of KEGG pathway on black seabream hepatic DEM between ASJ1 and CTRL group.

| Type                                 | ID        | DEM                  | VIP  | log2FC | Pvalue | KEGG pathway                     |
|--------------------------------------|-----------|----------------------|------|--------|--------|----------------------------------|
| Lipid metabolism                     | meta_20   | Taurine              | 1.59 | -0.52  | 0.01   | Primary bile acid biosynthesis   |
|                                      | meta_3138 | 20-HETE              | 1.55 | -0.46  | 0.01   | Arachidonic acid metabolism      |
|                                      | meta_820  | 3-                   | 1.49 | -0.82  | 0.03   | Sphingolipid metabolism          |
|                                      | meta_480  | Choline              | 1.46 | -0.26  | 0.03   | Glycerophospholipid metabolism   |
|                                      | meta_50   | Caprylic acid        | 1.51 | -0.37  | 0.03   | Fatty acid biosynthesis          |
|                                      | meta_2806 | Dihydroceramide      | 1.54 | -0.62  | 0.03   | Sphingolipid metabolism          |
|                                      | meta_1058 | Vitamin D3           | 1.43 | -0.35  | 0.04   | Steroid biosynthesis             |
|                                      | meta_1685 | CDP-glycerol         | 1.44 | -0.72  | 0.04   | Glycerophospholipid metabolism   |
|                                      | meta_1218 | PS(18:0/20:4(8Z,11Z  | 1.51 | -0.89  | 0.04   | Glycerophospholipid metabolism   |
|                                      | meta_202  | LysoPC(20:2(11Z,14   | 1.39 | -0.67  | 0.05   | Glycerophospholipid metabolism   |
| Amino acid metabolism                | meta_3033 | L-Threonine          | 1.58 | -0.64  | 0.02   | Glycine, serine and threonine    |
|                                      | meta_376  | 5'-                  | 1.43 | -0.48  | 0.04   | Cysteine and methionine          |
|                                      | meta_275  | 1-Pyrroline-2-       | 1.55 | -0.40  | 0.04   | Arginine and proline metabolism  |
|                                      | meta_131  | 5-Hydroxy-L-         | 1.48 | -0.43  | 0.05   | Tryptophan metabolism            |
|                                      | meta_580  | 4-Oxo-1-(3-pyridyl)- | 1.55 | -0.45  | 0.01   | Nicotinate and nicotinamide      |
| Metabolism of cofactors and vitamins | meta_138  | Vitamin A            | 1.50 | -0.73  | 0.03   | Retinol metabolism               |
|                                      | meta_1044 | Gamma-Tocotrienol    | 1.44 | -0.80  | 0.04   | Ubiquinone and other terpenoid-  |
|                                      | meta_2838 | Pipecolic acid       | 1.55 | -0.48  | 0.01   | Metabolic pathways               |
| Global and overview maps             | meta_5    | L-Pipecolic acid     | 1.53 | -0.76  | 0.02   | Metabolic pathways               |
|                                      | meta_3009 | L-3-Cyanoalanine     | 1.53 | -0.45  | 0.05   | Metabolic pathways               |
|                                      | meta_1319 | Deoxyadenosine       | 1.52 | -0.38  | 0.02   | Purine metabolism                |
| Nucleotide metabolism                | meta_3114 | Pseudouridine        | 1.54 | -0.49  | 0.02   | Pyrimidine metabolism            |
|                                      | meta_762  | Digoxin              | 1.46 | -0.77  | 0.04   | Bile secretion                   |
| Digestive system                     | meta_2767 | Pyridoxamine         | 1.42 | -0.38  | 0.05   | Vitamin digestion and absorption |
| Xenobiotics                          | meta_2686 | 6-Thioguanosine      | 1.51 | -0.63  | 0.03   | Drug metabolism - other          |
| Signaling molecules and              | meta_338  | Anandamide           | 1.50 | -0.76  | 0.03   | Neuroactive ligand-receptor      |
| Metabolism of                        | meta_143  | Farnesol             | 1.53 | -1.42  | 0.04   | Terpenoid backbone biosynthesis  |
| Membrane transport                   | meta_1230 | L-Lysine             | 1.60 | -0.65  | 0.01   | ABC transporters                 |
| Cardiovascular disease               | meta_74   | Hyaluronic acid      | 1.57 | -0.89  | 0.01   | Fluid shear stress and           |
| Carbohydrate                         | meta_3159 | D-Sorbitol 6-        | 1.56 | -0.87  | 0.03   | Fructose and mannose             |
